# Supplementary material
Source: publisher figshare collection journal article supplement (https://karger.figshare.com/ndownloader/files/13113014)
Supplement: Supplementary file 1 [file 13113014]

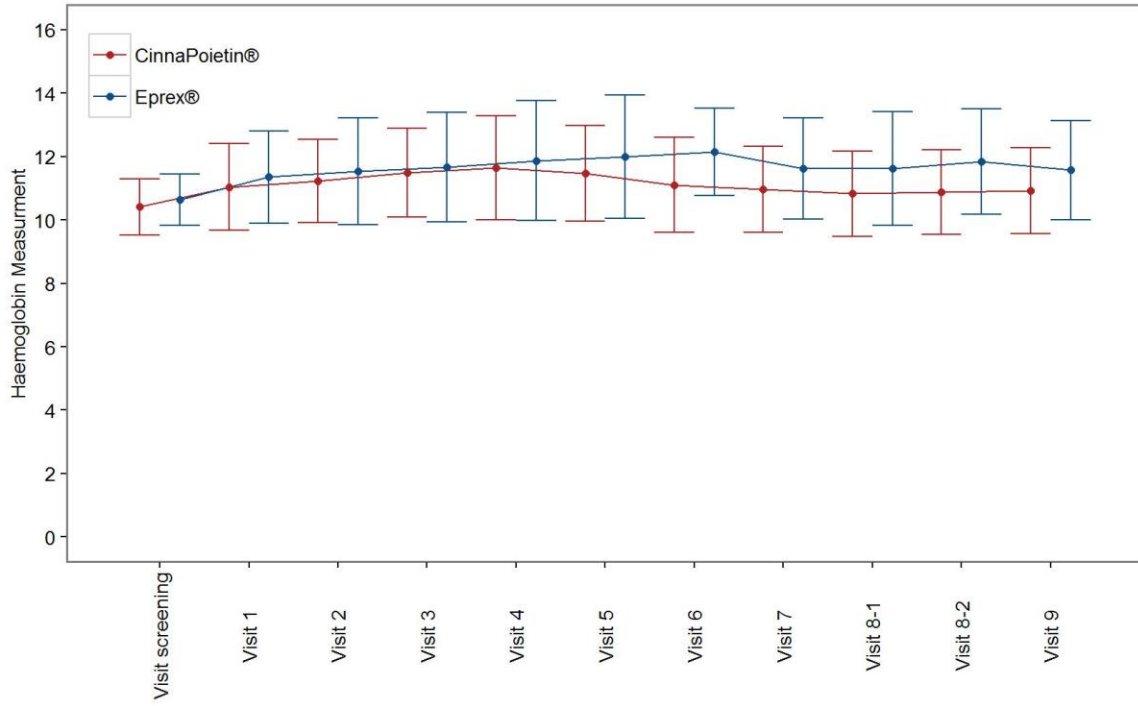

*Figure S1. Hb over time for both groups*

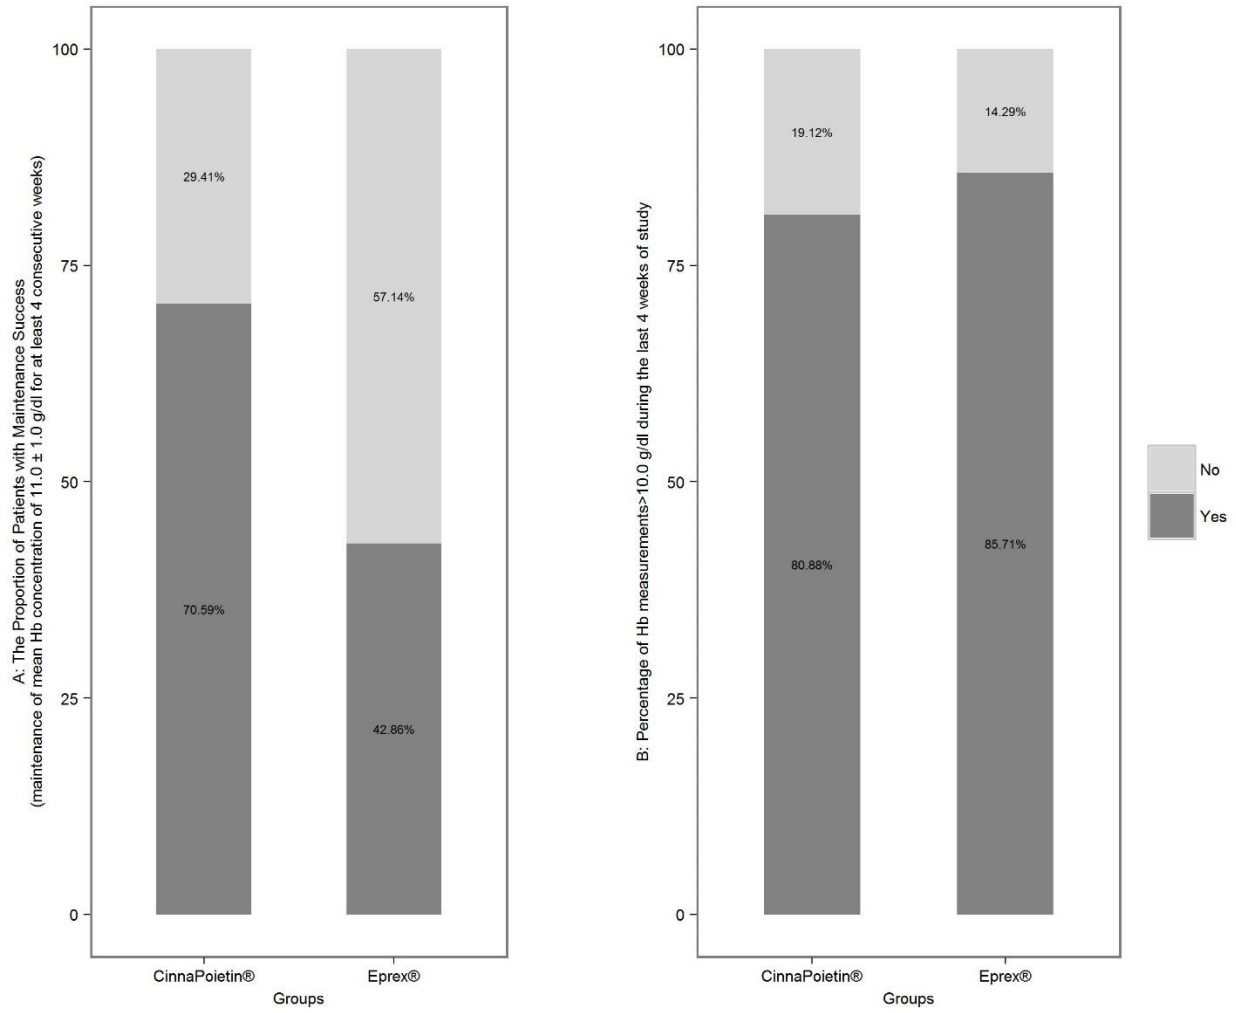

Figure S2. Proportion of patients with maintenance success and percentage of Hb measurements >10.0 gr/dl during the last four weeks.

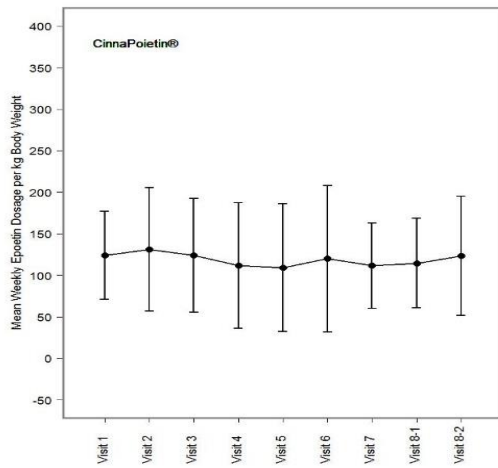

No significant difference in the starting dose vs end for CinnaPoietin® (p-value = 0.83)

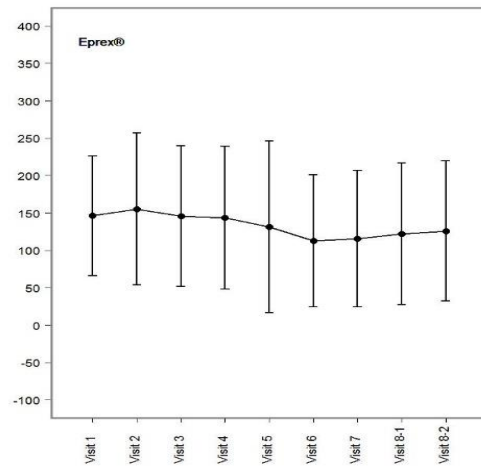

No significant difference in the starting dose vs for Eprex® (p-value = 0.15)

*Figure S3. Mean weekly epoetin dosage trend over visits*

*Table S1. Route of administration by group*

| <b>Group</b>  | <b>Route of administration</b> | <b>N (%)</b> |
|---------------|--------------------------------|--------------|
| CinnaPoietin® | IV                             | 25 (32.05)   |
| Eprex®        | IV                             | 23 (29.49)   |
| CinnaPoietin® | SC                             | 53 (67.95)   |
| Eprex®        | SC                             | 55 (70.51)   |

Table. S2. Summarizing data on hemoglobin, hematocrit and iron status excluding patients with mean Hgb  $\geq 13$

| Group    | CinnaPoietin® |               | Eprex® |              | Total |               | P-value |
|----------|---------------|---------------|--------|--------------|-------|---------------|---------|
|          | N             | Mean±SD       | N      | Mean±SD      | N     | Mean±SD       |         |
| Hgb      | 66            | 10.82±1.09    | 45     | 11.12±1.19   | 111   | 10.94±1.14    | 0.16    |
| Hct      | 66            | 33.76±3.55    | 45     | 34.8±3.57    | 111   | 34.18±3.58    | 0.14    |
| Ferritin | 65            | 504.24±390.28 | 45     | 497.13±320.7 | 110   | 501.33±361.89 | 0.92    |
| TSAT     | 64            | 27.75±11.75   | 45     | 46.54±64.97  | 109   | 35.51±43.43   | 0.06    |
